# Supplementary material
Source: HighWire-hosted journal article supplement (https://www.cmajopen.ca/highwire/filestream/88249/field_highwire_adjunct_files/3/open-2021-0192-4-at.pdf)
Supplement: open-2021-0192-4-at.pdf [file open-2021-0192-4-at.pdf]

## 1 Supplementary Material

**Supplemental Table 3. Risk of bias assessment using the Newcastle-Ottawa Scale**

| Author (year)                                                  | Selection |   |   |   | Comparability |   | Outcome |   |   | Total |
|----------------------------------------------------------------|-----------|---|---|---|---------------|---|---------|---|---|-------|
|                                                                | 1         | 2 | 3 | 4 | 5             | 6 | 7       | 8 | 9 |       |
| Sproule (1988) <sup>1</sup>                                    | ★         | ★ | ★ | - | -             | - | ★       | ★ | ★ | 6     |
| Mundt (1990) <sup>2</sup>                                      | ★         | ★ | ★ | - | -             | - | -       | ★ | ★ | 5     |
| Rich (1990) <sup>3</sup>                                       | -         | ★ | ★ | - | -             | - | ★       | ★ | ★ | 5     |
| Mauser (1992) <sup>4</sup>                                     | ★         | ★ | ★ | - | ★             | - | ★       | ★ | ★ | 7     |
| Leenaars (1993, 1994, 1996, 1997b, 2001, 2003) <sup>5-10</sup> | ★         | ★ | ★ | - | ★             | - | ★       | ★ | ★ | 6     |
| Carrington (1994a) <sup>11</sup>                               | -         | ★ | ★ | - | -             | - | ★       | ★ | ★ | 5     |
| Carrington (1994b) <sup>12</sup>                               | ★         | ★ | ★ | - | ★             | - | ★       | ★ | ★ | 7     |
| Leenaars (1997a) <sup>13</sup>                                 | ★         | ★ | ★ | - | ★             | - | ★       | ★ | ★ | 7     |
| Bridges (2004) <sup>14</sup>                                   | ★         | ★ | ★ | - | -             | - | ★       | ★ | ★ | 6     |
| Caron (2004) <sup>15</sup>                                     | -         | ★ | ★ | - | -             | - | ★       | ★ | ★ | 5     |
| Cheung (2005) <sup>16</sup>                                    | -         | ★ | ★ | - | -             | - | ★       | ★ | ★ | 5     |
| Caron (2008) <sup>17</sup>                                     | -         | ★ | ★ | - | ★             | - | ★       | ★ | ★ | 6     |
| Gagne (2010) <sup>18</sup>                                     | -         | ★ | ★ | - | -             | - | ★       | ★ | ★ | 5     |
| Blais (2011) <sup>19</sup>                                     | ★         | ★ | ★ | - | ★             | ★ | ★       | ★ | ★ | 8     |
| Langmann (2012) <sup>20</sup>                                  | ★         | ★ | ★ | - | ★             | ★ | ★       | ★ | ★ | 8     |
| Linteau (2013) <sup>21</sup>                                   | -         | ★ | ★ | - | ★             | ★ | ★       | ★ | ★ | 7     |
| McPhedran (2013) <sup>22</sup>                                 | ★         | ★ | ★ | - | -             | - | ★       | ★ | ★ | 6     |
| Langmann (2020) <sup>23</sup>                                  | ★         | ★ | ★ | - | ★             | ★ | ★       | ★ | ★ | 8     |

Articles were assessed using the NewCastle-Ottawa Scale (NOS) for case-control or cohort studies. High quality choices are identified with a star. A maximum of one star can be awarded to each item within the Selection and Outcome categories; a maximum of two stars can be awarded for Comparability. Overall NOS scores of 0–3, 4–6, and 7–9 were considered as low, moderate and high quality, respectively.

## References

1. Sproule CF, Kennett DJ. The use of firearms in Canadian homicides 1972–1982: the need for gun control. *Can J Criminol* 1988;30:31-8.

2. Mundt RJ. Gun control and rates of firearms violence in Canada and the United States. *Can J Criminol* 1990;32:137-54.
3. Rich CL, Young JG, Fowler RC, et al. Guns and suicide: possible effects of some specific legislation. *Am J Psychiatry* 1990;147:342-6.
4. Mauser GA, Holmes RA. An evaluation of the 1977 Canadian firearms legislation. *Eval Rev* 1992;16:603-17.
5. Lester D, Leenaars A. Suicide rates in Canada before and after tightening firearm control laws. *Psychol Rep* 1993;72:787-90.
6. Leenaars AA, Lester D. Effects of gun control on homicide in Canada. *Psychol Rep* 1994;75:81-2.
7. Leenaars A, Lester D. Gender and the impact of gun control on suicide and homicide. *Arch Suicide Res* 1996;2:223-34.
8. Leenaars A, Lester D. The impact of gun control on suicide and homicide across the life span. *Can J Behav Sci* 1997a;29:1-6.
9. Leenaars A, Lester D. The impact of gun control (Bill C-51) on homicide in Canada. *J Crim Justice* 2001;29:287-94.
10. Leenaars AA, Moksony F, Lester D, et al. The impact of gun control (Bill C-51) on suicide in Canada. *Death Stud* 2003;27:103-24.
11. Carrington PJ, Moyer S. Gun control and suicide in Ontario. *Am J Psychiatry* 1994a;151:606-8.
12. Carrington P, Moyer S. Gun availability and suicide in Canada: testing the displacement hypothesis. *Stud Crime Crime Prev* 1994b;3:168-78.
13. Leenaars AA, Lester D. The effects of gun control on the accidental death rate from firearms in Canada. *J Safety Res* 1997b;28:119-22.
14. Bridges FS. Gun control law (Bill C-17), suicide, and homicide in Canada. *Psychol Rep* 2004;94:819-26.
15. Caron J. Gun control and suicide: possible impact of Canadian legislation to ensure safe storage of firearms. *Arch Suicide Res* 2004;8:361-74.
16. Cheung AH, Dewa CS. Current trends in youth suicide and firearms regulations. *Can J Public Health* 2005;96:131-5.
17. Caron J, Julien M, Huang JH. Changes in suicide methods in Quebec between 1987 and 2000: the possible impact of Bill C-17 requiring safe storage of firearms. *Suicide Life Threat Behav* 2008;38:195-208.
18. Gagné M, Robitaille Y, Hamel D, et al. Firearms regulation and declining rates of male suicide in Quebec. *Inj Prev* 2010;16:247-53.
19. Blais É, Gagné MP, Linteau I. The effect of gun control laws on homicides in Canada, 1974–2004 [article in French]. *Can J Criminol Crim Justice* 2011;53:27-61.
20. Langmann C. Canadian firearms legislation and effects on homicide 1974 to 2008. *J Interpers Violence* 2012;27:2303-21.
21. Linteau I, Blais É. The effect of Bill C-68 on homicides in Quebec: an analysis of the extreme bounds [article in French]. *Criminologie* 2013;45:219-48.
22. McPhedran S, Mauser G. Lethal firearm-related violence against Canadian women: Did tightening gun laws have an impact on women's health and safety? *Violence Vict* 2013;28:875-83.

- 1
- 2 23. Langmann C. Effect of firearms legislation on suicide and homicide in Canada from 1981 to 2016. PLoS One
- 3 2020;15:e0234457.
